# Supplementary material for: OSbrca: A Web Server for Breast Cancer Prognostic Biomarker Investigation With Massive Data From Tens of Cohorts
Source: Front Oncol. 2019 Dec 20;9:1349. doi: 10.3389/fonc.2019.01349 (PMC6932997; doi:10.3389/fonc.2019.01349)
Supplement: Supplementary file 1 [file Table_1.XLSX]

## Sheet: Table S1
Previously reported biomarkers of breast cancer							Consistent /Inconsistent results of Top6 cohorts	P value/HR(95%CI)of survival in Top6 breast cancer cohorts
								TCGA					GSE20685		GSE17705	GSE2034	GSE26971	GSE31448
	Gene symbol	n	Expression associated with poor prognosis	Survival	Methods	Reference		OS	DFI	PFI	DSS	PFS	OS	MFS	RFS	MFS	MFS	DFS
1	ACKR3	115	High	OS	qPCR	Wu et al., 2015	3/0	NA	NA	NA	NA	NA	NA	0.0256/1.67（1.06-2.64）	NA	0.0063/1.74（1.17-2.59）	NA	0.0024/1.98(1.27-3.10)
2	ADAM33	212	High	OS/MFS	IHC	Manica et al., 2017	0/0	NA	NA	NA	NA	NA	NA	NA	NA	NA	NA	NA
3	AGR2	225	Low	OS	IHC	Innes et al., 2006	0/0	NA	NA	NA	NA	NA	NA	NA	NA	NA	NA	NA
4	AIF1L	287	High	DFS	IHC	Liu et al., 2018c	2/0	NA	NA	0.0329/1.48(1.03-2.13)	NA	NA	0.01/2.13（1.35-3.29）	0.01/1.8103（1.15-2.84）	NA	NA	NA	NA
5	ALAD	188	Low	DFS	IHC	Ge et al., 2017	1/0	NA	NA	NA	NA	NA	NA	NA	NA	NA	0.0069/0.33(0.15-0.74)	NA
6	ANLN	348	High	OS	IHC	Magnusson et al., 2016	2/0	NA	NA	NA	NA	NA	0.0106/1.80（1.14-2.84）	0.0256/1.67（1.06-2.64）	NA	NA	NA	0.0211/1.77(1.09-2.89)
7	ANXA3	309	High	DFS	IHC	Zhou et al., 2017	0/0	NA	NA	NA	NA	NA	NA	NA	NA	NA	NA	NA
8	AOC3	148	High	OS	IHC	Lai et al., 2018	0/0	NA	NA	NA	NA	NA	NA	NA	NA	NA	NA	NA
9	ARID1B	142	High	OS/PFS	IHC	Cui et al., 2019	2/0	NA	NA	NA	NA	NA	0.0343/1.63（1.03-2.59）	NA	NA	NA	NA	0.0172/1.77(1.10-2.85)
10	Bag4	410	High	OS	IHC	Davidson et al., 2016	1/0	NA	NA	NA	NA	NA	NA	0.0418/1.60（1.02-2.53）	NA	NA	NA	NA
11	BCL2	238	Low	OS	IHC	Ayadi et al.	3/0	NA	NA	NA	NA	NA	0.0168/0.47（0.26-0.87）	0.0219/0.50（0.28-0.90）	NA	NA	0.0152/0.37（0.17-0.82）	0.0212/0.51(0.29-0.90)
12	BCL2L11	275	High	OS	IHC	Maimaiti et al., 2017	0/0	NA	NA	NA	NA	NA	NA	NA	NA	NA	NA	NA
13	Bora	538	High	OS/DFS	IHC	Zhang et al., 2017b	2/0	NA	NA	NA	NA	NA	NA	NA	0.0091/1.91(1.17-3.12)	NA	0.039/1.77(1.02-3.04)	NA
14	BRCA1	493	High	DFS/OS	IHC	Song et al., 2018	3/0	NA	NA	NA	NA	NA	NA	NA	0.0396/1.73（1.02-2.93）	NA	0.0315/1.80（1.05-3.07）	0.0337/1.65(1.03-2.64)
15	CA9	124	High	DFS	IHC	Pinheiro et al., 2011	4/0	NA	NA	0.0161/1.56(1.08-2.24)	NA	NA	0.007/1.87（1.19-2.94）	0.0057/1.88（1.20-2.95）	NA	NA	0.0349/1.79（1.04-3.08）	<0.0001/2.40(1.52-3.79)
16	CAP2	126	High	OS	IHC	Xu et al., 2016	1/2	NA	NA	NA	0.0228/1.94(1.09-3.45)	NA	0.0267/0.51（0.28-0.93）	NA	NA	NA	NA	0.037/0.55(0.32-0.96)
17	Cav1	91	Low	PFS	IHC	El-Gendi et al., 2012	1/0	NA	NA	NA	NA	NA	NA	NA	0.0352/0.47(0.23-0.94)	NA	NA	NA
18	CBX4	179	High	OS	IHC	Zeng et al., 2018	0/0	NA	NA	NA	NA	NA	NA	NA	NA	NA	NA	NA
19	CCNA2	218	High	DFS	IHC	Klintman et al., 2013	2/0	NA	NA	NA	NA	NA	0.0466/1.60（1.01-2.53）	NA	NA	0.0076/2.07（1.21-3.55）	NA	NA
20	CCNB1	217	High	DFS	IHC	Klintman et al., 2013	3/0	NA	NA	NA	NA	NA	0.003/1.98（1.26-3.10）	0.0247/1.68（1.07-2.66）	NA	NA	0.0026/2.25（1.32-3.82）	0.0023/2.04(1.29-3.23)
21	CD151	886	High	OS	IHC	Kwon et al., 2012	0/0	NA	NA	NA	NA	NA	NA	NA	NA	NA	NA	NA
22	CD24	1125	High	OS	IHC	Chan et al., 2019	3/0	<0.0001/1.94(1.38-2.72)	NA	<0.0001/1.87(1.31-2.67)	NA	<0.0001/1.68(1.25-2.25)	NA	NA	0.0453/1.67（1.01-2.78)	NA	NA	0.0455/1.61(1.00-2.57)
23	CD274	94	High	DFS	IHC	Wu et al., 2019	2/0	NA	0.0418/2.12(1.02-4.40)	NA	NA	NA	NA	NA	NA	NA	NA	0.0197/0.48(0.26-0.89)
24	CD44	325	High	OS	IHC	Han et al., 2015	0/3	NA	NA	NA	NA	NA	0.0318/0.52（0.29-0.95）	0.0305/0.52（0.29-0.94）	NA	0.0037/0.45(0.26-0.77)	NA	0.0186/0.46(0.24-0.88)
25	CD81	139	High	OS	IHC	Zhang et al., 2018a	0/0	NA	NA	NA	NA	NA	NA	NA	NA	NA	NA	NA
26	CD82	325	Low	OS	IHC	Han et al., 2015	0/0	NA	NA	NA	NA	NA	NA	NA	NA	NA	NA	NA
27	CDH3	118	High	OS/DFS	IHC	Vieira et al., 2017	1/0	NA	NA	NA	NA	NA	0.0187/1.73（1.10-2.73）	NA	NA	NA	NA	NA
28	CDK9	84	Low	OS	IHC	Schlafstein et al., 2018	0/0	NA	NA	NA	NA	NA	NA	NA	NA	NA	NA	NA
29	CHP2	212	High	OS	IHC	Zhao et al., 2018	0/0	NA	NA	NA	NA	NA	NA	NA	NA	NA	NA	NA
30	COPS5	76	High	OS/DFS	IHC	Hou et al., 2017	2/0	0.0043/1.67(1.17-2.37)	NA	0.037/1.49(1.02-2.16)	NA	0.0244/1.42(1.04-1.94)	NA	NA	<0.0001/2.53(1.57-4.08)	NA	NA	NA
31	CTHRC1	121	High	OS/RFS	IHC	Lai et al., 2017	0/0	NA	NA	NA	NA	NA	NA	NA	NA	NA	NA	NA
32	CTSD	255	High	RFS	IHC	Ashraf et al., 2019	0/0	NA	NA	NA	NA	NA	NA	NA	NA	NA	NA	NA
33	CXCL12	115	High	OS	qPCR	Wu et al., 2015	0/2	NA	NA	NA	NA	NA	NA	NA	0.0255/0.46（0.23-0.91）	0.0262/0.56(0.34-0.93)	NA	NA
34	DDX3X	97	High	OS	IHC	Heerma van Voss et al., 2017	1/0	NA	NA	NA	NA	NA	NA	NA	NA	0.0365/1.54(1.02-2.32)	NA	NA
35	DHX32	193	High	OS/DFS	IHC	Wang et al., 2017b	1/3	NA	NA	NA	NA	NA	0.0301/0.52（0.29-0.94）	NA	0.0191/0.44(0.22-0.87)	0.0061/1.74(1.17-2.60)	0.0315/0.45(0.22-0.93)	NA
36	DKK2	45	High	OS/RFS	IHC	Shao et al., 2018	2/0	0.0082/1.58(1.12-2.23)	NA	NA	NA	0.0268/1.39(1.03-1.88)	0.0474/1.59（1.01-2.53）	NA	NA	NA	NA	NA
37	DOCK4	345	High	DFS	IHC	Westbrook et al., 2019	0/0	NA	NA	NA	NA	NA	NA	NA	NA	NA	NA	NA
38	EGFR	151	High	DFS	IHC	Park et al., 2014	1/1	NA	NA	NA	NA	NA	0.0423/1.61（1.02-2.56）	NA	0.021/0.45（0.23-0.88）	NA	NA	NA
39	ENG	53	High	OS	IHC	Martinez et al., 2015	0/0	NA	NA	NA	NA	NA	NA	NA	NA	NA	NA	NA
40	EphA6	26	High	OS	qPCR/IHC	Zhou et al., 2018a	0/0	NA	NA	NA	NA	NA	NA	NA	NA	NA	NA	NA
41	ERBB2	724	High	PFS	PCR	Prat et al., 2019	2/0	NA	0.0126/2.25(1.18-4.26)	NA	NA	NA	0.01/2.18（1.40-3.40）	0.0047/1.91（1.22-2.99）	NA	NA	NA	NA
42	ERBB3	177	Low	RFS	IHC	Luhtala et al., 2018	2/0	NA	NA	NA	NA	NA	NA	0.0469/0.56（0.31-1.00）	NA	NA	0.0387/0.47（0.23-0.96）	NA
43	ESPL1	349	High	DSS	IHC	Gurvits et al., 2017	2/0	NA	NA	NA	NA	NA	0.0214/1.71（1.08-2.70）	NA	NA	0.0248/1.59(1.06-2.39)	NA	NA
44	FAP	112	High	RFS	IHC	Ariga et al., 2001	1/0	NA	NA	NA	NA	NA	NA	NA	NA	0.025/1.58（1.05-2.37）	NA	NA
45	FFAR4	307	High	RFS	IHC	Chu et al., 2019	0/0	NA	NA	NA	NA	NA	NA	NA	NA	NA	NA	NA
46	FOXO3	125	High	DFS	IHC	Rehman et al., 2018	0/0	NA	NA	NA	NA	NA	NA	NA	NA	NA	NA	NA
47	G6PD	198	High	OS/PFS	IHC	Dong et al., 2016	2/0	NA	NA	0.0211/1.54(1.06-2.23)	NA	NA	0.0043/1.93（1.23-3.02）	0.027/1.67（1.06-2.63）	NA	NA	NA	NA
48	GFPT1	198	High	OS/PFS	IHC	Dong et al., 2016	2/0	0.0358/1.45(1.02-2.07)	NA	0.0119/1.59(1.10-2.29)	NA	0.0034/1.55(1.15-2.09)	NA	NA	0.0221/1.82(1.09-3.06)	NA	NA	NA
49	GJA1	1118	Low	BCSS/MFS	IHC	Chasampalioti et al., 2019	1/0	NA	NA	NA	NA	NA	0.0131/0.46（0.25-0.85）	0.0154/0.47（0.25-0.87）	NA	NA	NA	NA
50	HDAC5	149	High	MFS	IHC	Li et al., 2016	1/0	0.0358/1.46(1.02-2.07)	NA	0.0387/1.47(1.02-2.14)	NA	0.0066/1.51(1.12-2.04)	NA	NA	NA	NA	NA	NA
51	HDAC9	118	High	OS	qPCR	Huang et al., 2018b	2/0	NA	NA	NA	NA	NA	NA	0.0271/1.67（1.06-2.63）	NA	NA	NA	0.0372/1.63(1.02-2.60)
52	HIST3H3	240	High	OS	IHC	Gudlaugsson et al., 2011	0/0	NA	NA	NA	NA	NA	NA	NA	NA	NA	NA	NA
53	HOXD3	119	High	OS/DFS	IHC	Shaoqiang et al., 2013	0/0	NA	NA	NA	NA	NA	NA	NA	NA	NA	NA	NA
54	HSF1	1841	High	OS	IHC	Santagata et al., 2011	2/0	NA	NA	NA	NA	NA	NA	0.0446/1.59（1.01-2.51）	NA	0.0253/1.59(1.05-2.40)	NA	NA
55	HSP90AA1	410	High	OS	IHC	Davidson et al., 2016	5/0	0.0183/1.52(1.07-2.17)	NA	NA	0.0395/1.91(1.03-3.56)	0.0094/1.48(1.10-2.00)	0.0123/1.78（1.13-2.78）	NA	0.0204/1.77(1.09-2.87)	0.0065/1.74(1.16-2.59)	0.0215/0.41(0.19-0.87)	NA
56	HSPA4	410	High	OS	IHC	Davidson et al., 2016	1/0	0.0462/1.42(1.00-2.02)	NA	NA	NA	NA	NA	NA	NA	NA	NA	NA
57	ICAM1	169	High	RFS	IHC	Schröder et al., 2011	0/2	0.0339/0.65(0.44-0.96)	NA	0.021/0.60(0.39-0.92)	NA	0.0062/0.61(0.43-0.87)	NA	NA	NA	0.0104/0.50（0.30-0.85）	NA	NA
58	IFNG	269	Low	OS	IHC	Yeong et al., 2019	2/0	NA	NA	0.016/0.57(0.36-0.90)	NA	0.0304/0.68(0.48-0.96)	NA	0.05/0.56（0.32-1.00）	NA	NA	NA	NA
59	INPP4B	239	High	OS	IHC	Asleh et al., 2019	0/0	NA	NA	NA	NA	NA	NA	NA	NA	NA	NA	NA
60	Itga6	312	Low	DFS	IHC	Ye et al., 2017	4/0	NA	0.0273/0.37(0.15-0.89)	NA	NA	NA	NA	NA	0.0259/0.45(0.22-0.90)	0.02/0.54(0.33-0.90)	0.0353/0.44(0.21-0.94)	NA
61	ITGB3	164	Low	DFS	IHC	Cai et al., 2017	1/0	NA	NA	NA	NA	NA	NA	NA	NA	NA	0.0418/0.45（0.21-0.97）	NA
62	KAT2B	164	Low	DFS	IHC	Cai et al., 2017	1/0	NA	NA	NA	NA	NA	NA	0.034/0.53（0.29-0.95）	NA	NA	NA	NA
63	KATNB1	329	High	OS	IHC	Li et al., 2018b	4/0	NA	NA	NA	NA	NA	0.0082/1.85（1.17-2.91）	NA	0.038/1.56（1.04-2.35）	0.0308/1.56(1.04-2.35)	NA	0.0341/1.66(1.03-2.66)
64	KHDRBS1	271	High	OS	IHC	Song et al., 2010	1/1	NA	0.0287/0.43(0.20-0.91)	NA	NA	NA	NA	0.0209/1.71（1.18-2.70）	NA	NA	NA	NA
65	KIAA1524	218	High	RFS	IHC	Huang et al., 2018a	0/0	NA	NA	NA	NA	NA	NA	NA	NA	NA	NA	NA
66	KIF11	40	High	DFS	IHC	Jiang et al., 2017	3/0	NA	NA	NA	NA	NA	NA	NA	0.0187/1.84（1.10-3.07）	0.0225/1.60（1.06-2.41）	0.0212/1.87（1.09-3.18）	NA
67	KIF18A	1592	High	RFS	IHC	Alfarsi et al., 2019	3/0	0.762/1.05(0.73-1.51)	NA	NA	NA	NA	0.0295/1.66（1.05-2.62）	NA	0.0383/1.73（1.03-2.93）	NA	NA	NA
68	KIFC1	307	High	OS/PFS/MFS	IHC	Ogden et al., 2017	2/0	NA	NA	NA	NA	NA	NA	NA	0.0079/1.96(1.19-3.23)	NA	NA	0.0323/1.65(1.04-2.62)
69	LCN2	207	High	DSS/DFS	IHC	Bauer et al., 2008	0/0	NA	NA	NA	NA	NA	NA	NA	NA	NA	NA	NA
70	LOXL2	286	High	DFS	IHC	Wang et al., 2005	3/0	NA	NA	0.0158/1.58(1.08-2.29)	NA	NA	0.0312/1.65（1.05-2.61）	0.03.7/1.65（1.05-2.60）	NA	<0.001/2.50(1.69-.3.69)	NA	NA
71	MAP3K20	140	High	OS	IHC	Li et al., 2018a	0/0	NA	NA	NA	NA	NA	NA	NA	NA	NA	NA	NA
72	MET	1274	Low	OS	IHC	Ho-Yen et al., 2014	1/0	NA	NA	NA	NA	NA	NA	NA	0.0279/0.41(0.18-0.90)	NA	NA	NA
73	METTL13	131	High	DFS/OS	IHC	Wang et al., 2017c	0/0	NA	NA	NA	NA	NA	NA	NA	NA	NA	NA	NA
74	Mki67	1259	High	DFS	qPCR	Gao et al., 2019	3/0	NA	NA	NA	NA	NA	NA	NA	0.0033/2.06（1.27-3.35）	NA	0.0069/2.07(1.22-3.53)	0.0081/1.87(1.17-2.99)
75	MMP9	303	High	DFS	ELISA/IHC	Wang et al., 2018	1/0	NA	NA	NA	NA	NA	NA	NA	NA	NA	NA	0.0314/1.67(1.04-2.68)
76	MSI2	668	Low	RFS	qPCR/IHC	Kang et al., 2017	2/0	NA	NA	NA	NA	NA	0.0032/0.39（0.20-0.73）	0.0041/0.39（0.21-0.74）	NA	NA	NA	0.0447/0.57(0.33-0.98)
77	MTDH	225	High	OS	IHC	Li et al., 2008	2/0	NA	NA	NA	NA	NA	NA	NA	<0.0001/3.02(1.89-4.84)	0.0324/1.57(1.04-2.36)	NA	NA
78	mTOR	410	High	OS	IHC	Davidson et al., 2016	1/0	NA	NA	NA	NA	NA	NA	NA	0.0225/1.78(1.08-2.94)	NA	NA	NA
79	NCOA3	1396	High	DFS/OS	IHC	Alkner et al., 2017	3/0	NA	NA	NA	0.0189/2.06（1.12-3.76）	NA	NA	NA	0.0043/1.67(1.02-2.74)	NA	0.0037/2.20(1.29-3.73)	NA
80	Ncs1	619	High	RFS	IHC	Moore et al., 2017	4/0	0.0255/1.48(1.04-2.10)	NA	<0.0001/1.85(1.30-2.64)	NA	0.0105/1.47（1.09-1.98）	0.0087/1.82（1.16-2.86）	0.01/2.11（1.36-3.29）	NA	NA	0.0139/1.96(1.14-3.35)	0.0054/1.94(1.21-3.09)
81	NECTIN4	353	High	MFS	IHC	M et al., 2017	1/0	0.0011/1.77(1.25-2.50)	NA	NA	NA	0.0406/1.37(1.01-1.86)	NA	NA	NA	NA	NA	NA
82	NQO1	221	High	OS/DFS	IHC	Yang et al., 2017a	1/0	NA	NA	NA	NA	NA	NA	NA	<0.0001/2.49(1.54-4.02)	NA	NA	NA
83	PAIP1	119	High	OS	IHC	Piao et al., 2018	5/0	NA	0.0117/2.33(1.20-4.52)	NA	NA	NA	0.0101/1.80（1.15-2.82）	0.014/1.76（1.12-2.77）	0.0123/1.90(1.15-3.13)	NA	<0.0001/2.66(1.15-4.47)	0.0449/1.62(1.01-2.59)
84	PARP3	493	Low	DFS	IHC	Song et al., 2018	3/0	NA	NA	0.0148/0.56(0.35-0.89)	NA	NA	0.0105/0.44（0.23-0.82）	0.0053/0.41（0.21-0.76）	0.0293/0.45（0.22-0.92）	NA	NA	NA
85	PCGF2	213	High	DFS	FISH	Lee et al., 2018	2/0	NA	NA	NA	NA	NA	NA	NA	0.0463/1.64(1.00-2.70)	NA	NA	0.0392/1.62(1.02-2.57)
86	PDCD1	269	Low	OS	IHC	Yeong et al., 2019	2/0	0.0463/0.65(0.43-0.99)	NA	0.0407/0.62(0.40-0.98)	NA	0.0195/0.65(0.46-0.93)	NA	0.0249/0.51(0.28-0.92)	NA	NA	NA	NA
87	PDGFRB	283	High	OS/RFS	IHC	Paulsson et al., 2009	1/0	NA	NA	NA	NA	NA	NA	NA	NA	0.0449/1.51（1.00-2.27）	NA	NA
88	PDPN	367	High	OS/DFS	IHC	Schoppmann et al., 2012	1/0	NA	NA	NA	NA	NA	NA	NA	NA	0.0094/1.70（1.13-2.54）	NA	NA
89	PGK1	185	High	OS/DFS	IHC/qPCR	Fu et al., 2018	6/0	<0.0001/2.41(1.73-3.36)	0.0033/2.65(1.38-5.09)	<0.0001/2.04(1.43-2.92)	0.0205/2.01(1.11-3.64)	<0.0001/1.93(1.45-2.58)	0.001/2.10(1.35-3.29)	<0.0001/2.16(1.39-3.36)	<0.0001/2.98（1.85-4.82）	0.0257/1.59(1.05-2.40)	0.0291/1.83(1.06-3.14)	0.0364/1.66(1.03-2.68)
90	PIAS1	130	Low	OS	IHC	Chanda et al., 2017	2/1	NA	NA	NA	NA	NA	NA	NA	NA	0.05/0.61(0.37-1.00)	0.0498/1.73(1.00-3.00)	0.0084/0.45(0.25-0.81)
91	PKD1	527	High	MFS	IHC	Spasojevic et al., 2018	0/0	NA	NA	NA	NA	NA	NA	NA	NA	NA	NA	NA
92	PKM	198	High	OS/PFS	IHC	Dong et al., 2016	2/0	NA	0.0443/2.04(1.01-4.08)	NA	NA	NA	NA	NA	NA	0.0285/1.57(1.04-2.36)	NA	NA
93	POLD1	84	High	DFS	IHC	Qin et al., 2018	0/0	NA	NA	NA	NA	NA	NA	NA	NA	NA	NA	NA
94	PRKDC	82	High	OS	IHC	Sun et al., 2017	1/0	NA	NA	NA	NA	NA	0.0066/1.87（1.19-2.96）	NA	NA	NA	NA	NA
95	PROM1	325	High	OS	IHC	Han et al., 2015	1/0	NA	NA	0.0426/1.47（1.01-2.14）	NA	NA	NA	NA	NA	NA	NA	NA
96	PYCR1	140	High	OS/PFS	IHC	Ding et al., 2017	5/0	0.047/1.44(1.00-2.07)	NA	0.045/1.47（1.00-2.13）	NA	NA	0.022/1.70(1.08-2.69)	0.0257/1.68(1.06-2.65)	0.0461/1.64(1.00-2.67)	0.0046/1.78(1.19-2.66)	NA	0.0091/1.85(1.16-2.94)
97	Rab14	130	High	OS	IHC	Yu et al., 2016	3/2	0.0171/1.52(1.07-2.16)	NA	NA	NA	NA	0.0445/1.60(1.01-2.52)	NA	0.0152/1.84(1.12-3.02)	0.0238/0.56(0.34-0.92)	NA	0.0104/0.46(0.25-0.83)
98	RBM3	361	Low	DFS/OS	IHC	Kang et al., 2018	4/0	NA	NA	0.0106/0.55(0.34-0.86)	NA	0.0014/0.54(0.37-0.79)	0.0137/1.77(1.12-2.78)	NA	NA	0.0177/0.54（0.33-0.90）	0.0411/0.47（0.23-0.97）	NA
99	RHBDD1	116	High	RFS/OS	IHC	Zhang et al., 2018b	0/0	NA	NA	NA	NA	NA	NA	NA	NA	NA	NA	NA
100	RPLP1	81	High	OS	IHC	He et al., 2018	0/4	0.0401/0.65(0.43-0.98)	NA	NA	NA	0.0426/0.70(0.50-0.98)	0.0051/0.40(0.21-0.76)	0.0361/0.54(0.30-0.96)	0.018/0.47（0.25-0.87）	NA	NA	0.0063/0.42(0.23-0.78)
101	RPS6KA5	1092	Low	BCSS	IHC	Pu et al., 2018	1/0	NA	NA	NA	NA	NA	NA	NA	NA	NA	0.0212/0.41(0.19-0.87)	NA
102	RRM2	192	High	DFS	IHC	Putluri et al., 2014	5/0	NA	NA	NA	NA	0.0234/1.40(1.04-1.89)	0.0048/1.91(1.22-2.99)	0.0466/1.59(1.01-2.52)	NA	0.005/1.78(1.19-2.67)	<0.0001/2.51（1.48-4.24）	0.0075/1.87(1.18-2.96)
103	RSPO2	446	High	MFS	IHC	Coussy et al., 2017	1/0	NA	NA	0.0345/1.49(1.02-2.16)	NA	0.0061/1.52(1.12-2.06)	NA	NA	NA	NA	NA	NA
104	RSRP1	182	Low	OS	IHC	Hong et al., 2015	0/0	NA	NA	NA	NA	NA	NA	NA	NA	NA	NA	NA
105	S100A4	642	High	OS	IHC	Park et al., 2015	0/0	NA	NA	NA	NA	NA	NA	NA	NA	NA	NA	NA
106	SDCBP	100	High	OS/RFS	IHC	Liu et al., 2018b	0/0	NA	NA	NA	NA	NA	NA	NA	NA	NA	NA	NA
107	SEC62	53	High	OS	IHC	Takacs et al., 2019	1/0	NA	NA	NA	NA	NA	NA	NA	0.0118/1.90（1.15-3.13）	NA	NA	NA
108	SET	218	High	RFS	IHC	Huang et al., 2018a	1/0	NA	NA	NA	NA	NA	0.0332/1.64(1.04-2.59)	NA	NA	NA	NA	NA
109	SLC16A1	180	High	PFS	IHC	Johnson et al., 2017	0/1	NA	NA	NA	NA	NA	NA	NA	NA	NA	0.016/0.37(0.17-0.83)	NA
110	SLC2A1	740	High	DFS/OS	IHC	Choi et al., 2013	2/0	NA	NA	NA	NA	NA	0.0029/1.97(1.26-3.08)	<0.0001/2.32(1.50-3.61)	NA	NA	NA	0.0201/1.73(1.09-2.77)
111	SMN1	150	High	OS	IHC	Yang et al., 2017b	0/0	NA	NA	NA	NA	NA	NA	NA	NA	NA	NA	NA
112	SPAG5	159	High	OS	qPCR/IHC	Zhou et al., 2019	1/0	NA	NA	NA	NA	NA	0.01/2.13(1.36-3.33)	0.0102/1.81(1.15-2.84)	NA	NA	NA	NA
113	SPHK1	239	High	OS/RFS	IHC	Do et al., 2017	0/0	NA	NA	NA	NA	NA	NA	NA	NA	NA	NA	NA
114	SPP1	1681	High	DFS/OS	IHC	Psyrri et al., 2017	2/0	NA	NA	NA	NA	NA	NA	0.0435/1.61(1.01-2.54)	NA	NA	NA	<0.0001/2.29(1.44-3.63)
115	STIP1	228	High	OS/RFS	IHC	Wu et al., 2018	2/0	NA	0.0328/2.09(1.06-4.13)	NA	NA	NA	NA	0.0302/1.65(1.05-2.61)	NA	NA	NA	NA
116	SYK	90	Low	OS/DFS	qPCR/IHC	Toyama et al., 2003	0/0	NA	NA	NA	NA	NA	NA	NA	NA	NA	NA	NA
117	TNC	150	High	OS	IHC	Yang et al., 2017b	0/0	NA	NA	NA	NA	NA	NA	NA	NA	NA	NA	NA
118	TNFAIP8	351	High	OS/DFS	IHC	Xiao et al., 2017	0/0	NA	NA	NA	NA	NA	NA	NA	NA	NA	NA	NA
119	TP53INP1	453	High	OS/DFS	qPCR	Nishimoto et al., 2019	0/0	NA	NA	NA	NA	NA	NA	NA	NA	NA	NA	NA
120	TRIM21	169	Low	OS/DFS	IHC	Zhou et al., 2018b	1/0	0.0444/0.64(0.41-0.98)	NA	0.0044/0.48(0.29-0.79)	NA	<0.0001/0.49(0.33-0.74)	NA	NA	NA	NA	NA	NA
121	TWIST1	408	High	DFS	IHC	Zhang et al., 2015	1/0	NA	NA	0.015/1.57(1.09-2.26)	NA	NA	NA	NA	NA	NA	NA	NA
122	VIM	150	High	OS	IHC	Yang et al., 2017b	0/0	NA	NA	NA	NA	NA	NA	NA	NA	NA	NA	NA
123	VTCN1	147	High	OS	IHC	Huang et al., 2017	0/2	NA	NA	NA	NA	NA	NA	NA	NA	0.0018/0.41(0.24-0.72)	NA	0.0414/0.53(0.29-0.97)
124	WWC1	525	High	RFS	IHC	Mudduwa et al., 2018	1/0	NA	NA	NA	NA	NA	0.0046/1.90(1.22-2.97)	0.01/2.03(1.44-3.46)	NA	NA	NA	NA
125	XBP1	170	Low	OS	IHC	Wang et al., 2017a	2/0	NA	NA	NA	NA	NA	0.0263/0.52(0.29-0.93)	0.0486/0.57(0.33-1.00)	NA	NA	NA	0.0215/0.51(0.29-0.90)
126	YBX1	83	High	DFS	IHC	Janz et al., 2002	2/0	NA	NA	NA	NA	NA	0.0295/1.67(1.05-2.65)	NA	NA	NA	NA	0.0422/1.62(1.01-2.58)
127	ZHX3	98	Low	OS	IHC	You et al., 2019	1/0	NA	NA	NA	NA	NA	NA	NA	NA	NA	NA	0.0358/0.55(0.32-0.96)
128	ZNF217	68	High	RFS	qPCR	Vendrell et al., 2019	1/0	NA	NA	NA	NA	NA	NA	NA	NA	0.0086/1.73（1.14-2.55）	NA	NA
Note:	In order to analyze the association between previous reported genes and survival, the patients in our dataset were divided into two groups: the upper 25% expression versus the bottom 75% expression.
	NA：P>0.05 or not available
